# Supplementary material for: Improving reliability and absolute quantification of human brain microarray data by filtering and scaling probes using RNA-Seq
Source: PubMed Central journal article supplement (PMC4007560; doi:10.1186/1471-2164-15-154), 2014-02-24

Distance (1-R)

0 0.05 0.1 0.15

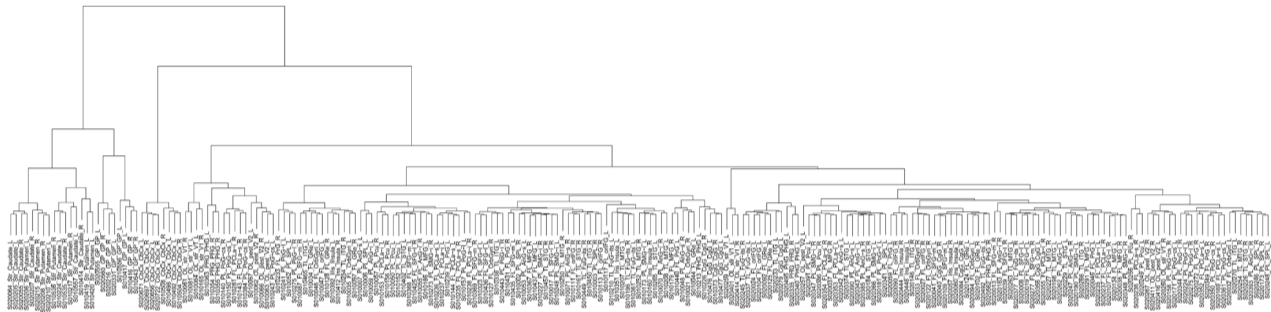

**Biological**

Ontology color

Brain region

Hemisphere

Brain of origin

**Technical**

Clip percentage

Num. of clusters

Microarray batch

RIN (RNA-quality)

RNA-seq batch

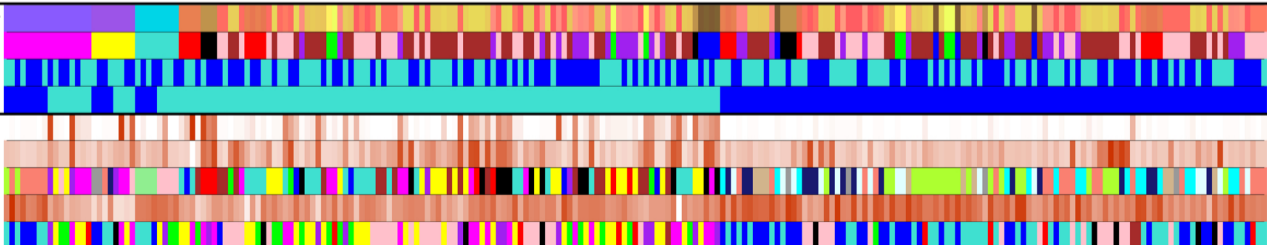

Supplement: 12864_2013_7016_MOESM2_ESM.pdf [file 12864_2013_7016_MOESM2_ESM.pdf]
