# Supplementary material for: Improving reliability and absolute quantification of human brain microarray data by filtering and scaling probes using RNA-Seq
Source: PubMed Central journal article supplement (PMC4007560; doi:10.1186/1471-2164-15-154), 2014-02-24

**More consistent between-sample expression after Tbt normalization**

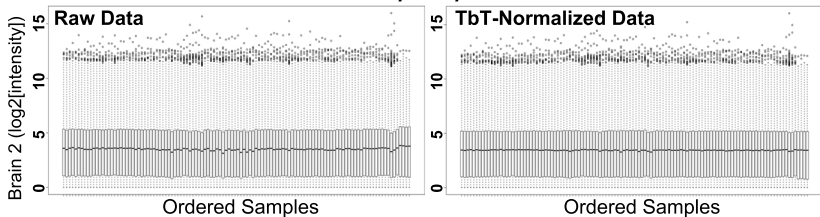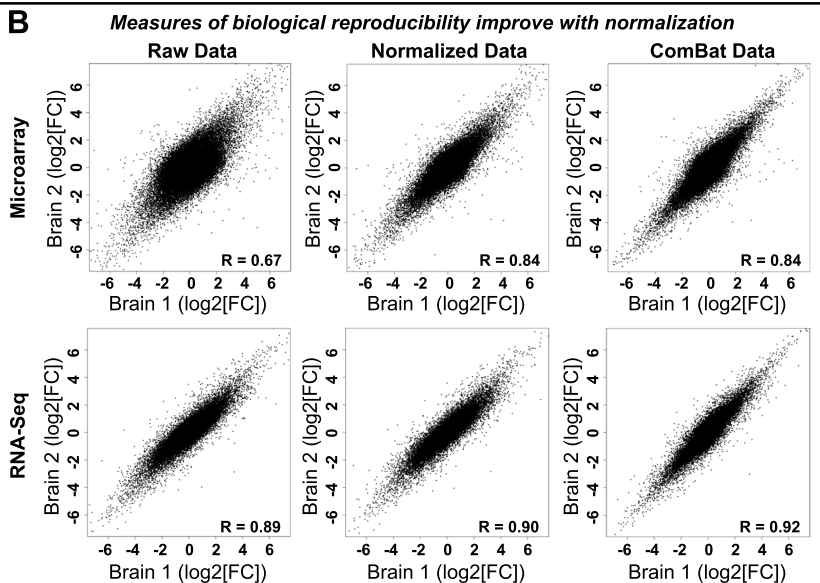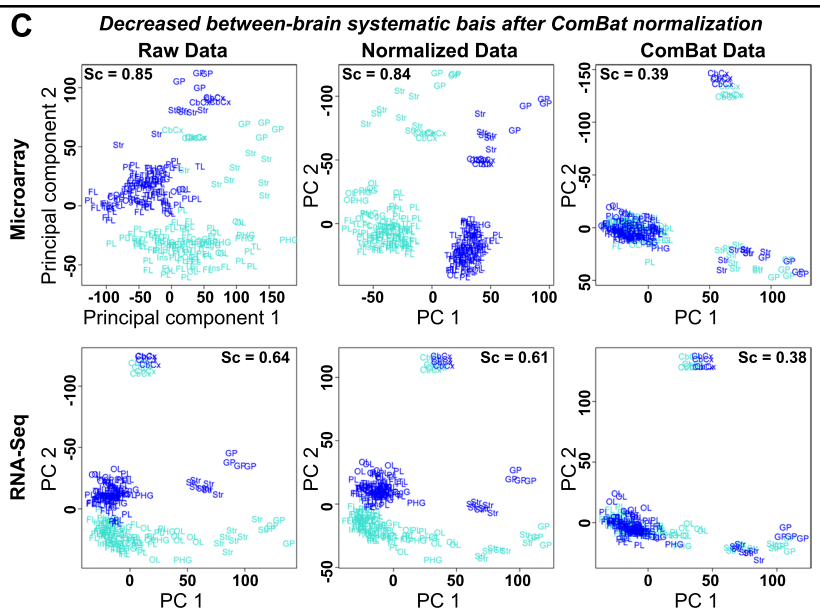

Supplement: 12864_2013_7016_MOESM4_ESM.pdf [file 12864_2013_7016_MOESM4_ESM.pdf]
